# Supplementary material for: MiR-486-5p-modified sEVs encapsulated in GelMA hydrogel facilitated wound healing by targeting Smurf2/TGF-β1 pathways
Source: Research Square preprint supplement (doi:10.21203/rs.3.rs-5667740/v1), 2024-12-23

**Additional Information**

**MiR-486-5p-modified sEVs encapsulated in GelMA hydrogel facilitated wound healing by targeting Smurf2/TGF-β1 pathways**

**Siyu Wang1†, Ziyu Zhou1†, Kunyu Lv1†, Yan Liu1, Lixin Feng1, Mengdan Zhang1,Wei Seong Toh2, 3*, Xiaoli Hu1***

**Inhibition of the TGF-β1/Smad2 signaling pathway attenuates sEV-486-5p induced angiogenesis *in vivo***

**Materials and methods:**

For the *in vivo* experiments, SB431542 was dissolved in the vehicle comprising of 4% DMSO, 30% PEG300, 5% Tween-80 and 61% ddH2O, following the manufacturer's instructions. A total of nine 8-week old female C57BL/6 mice weighing 18-22 g were randomly divided into three groups: (1) Control (PBS), (2) sEV-486-5p, and (3) sEV-486-5p + SB431542.

Following excision of the skin wounds after 6 h, mice in group (3) were intraperitoneally injected with SB431542 (5 mg/kg), whereas mice in groups (1) and (2) were given intraperitoneally an equal volume of vehicle [1]. One day after surgery, mice in groups (2) and (3) received a subcutaneous injection of 400 μL sEV-486-5p (300 μg/mL), while mice in group (1) received an equal volume of PBS.

**Results:**

To verify the role of TGF-β1/Smad2 signaling pathway in the process that sEV-486-5p accelerated wound healing *in vivo*, the inhibitor SB431542 was used to suppress TGF-β1/Smad2 signaling pathway. The subcutaneous injection of sEV-486-5p accelerated the cutaneous wound closure rate when compared to Control group, while this therapeutic effect was reduced after the TGF-β1/Smad2 signaling pathway was blocked by SB431542 (Fig. S1A & B). As shown in Fig. S1C, sEV-486-5p induced more newly formed blood vessels on day 14 post-wounding, while the therapeutic effect was inhibited by SB431542. In addition, H&E and immunohistochemical staining were carried out to quantify the amount of blood vessels (Fig. S1D & E) and the expression of CD31 (Fig. S1F & G) in wound sites. The images and quantitative analysis revealed that sEV-486-5p enhanced blood vessels formation, while the amount of blood vessels and the expression of CD31 were significantly decreased in the presence of SB431542. Collectively, sEV-486-5p accelerated wound healing by promoting angiogenesis via the TGF-β1/Smad2 signaling pathway in mice.


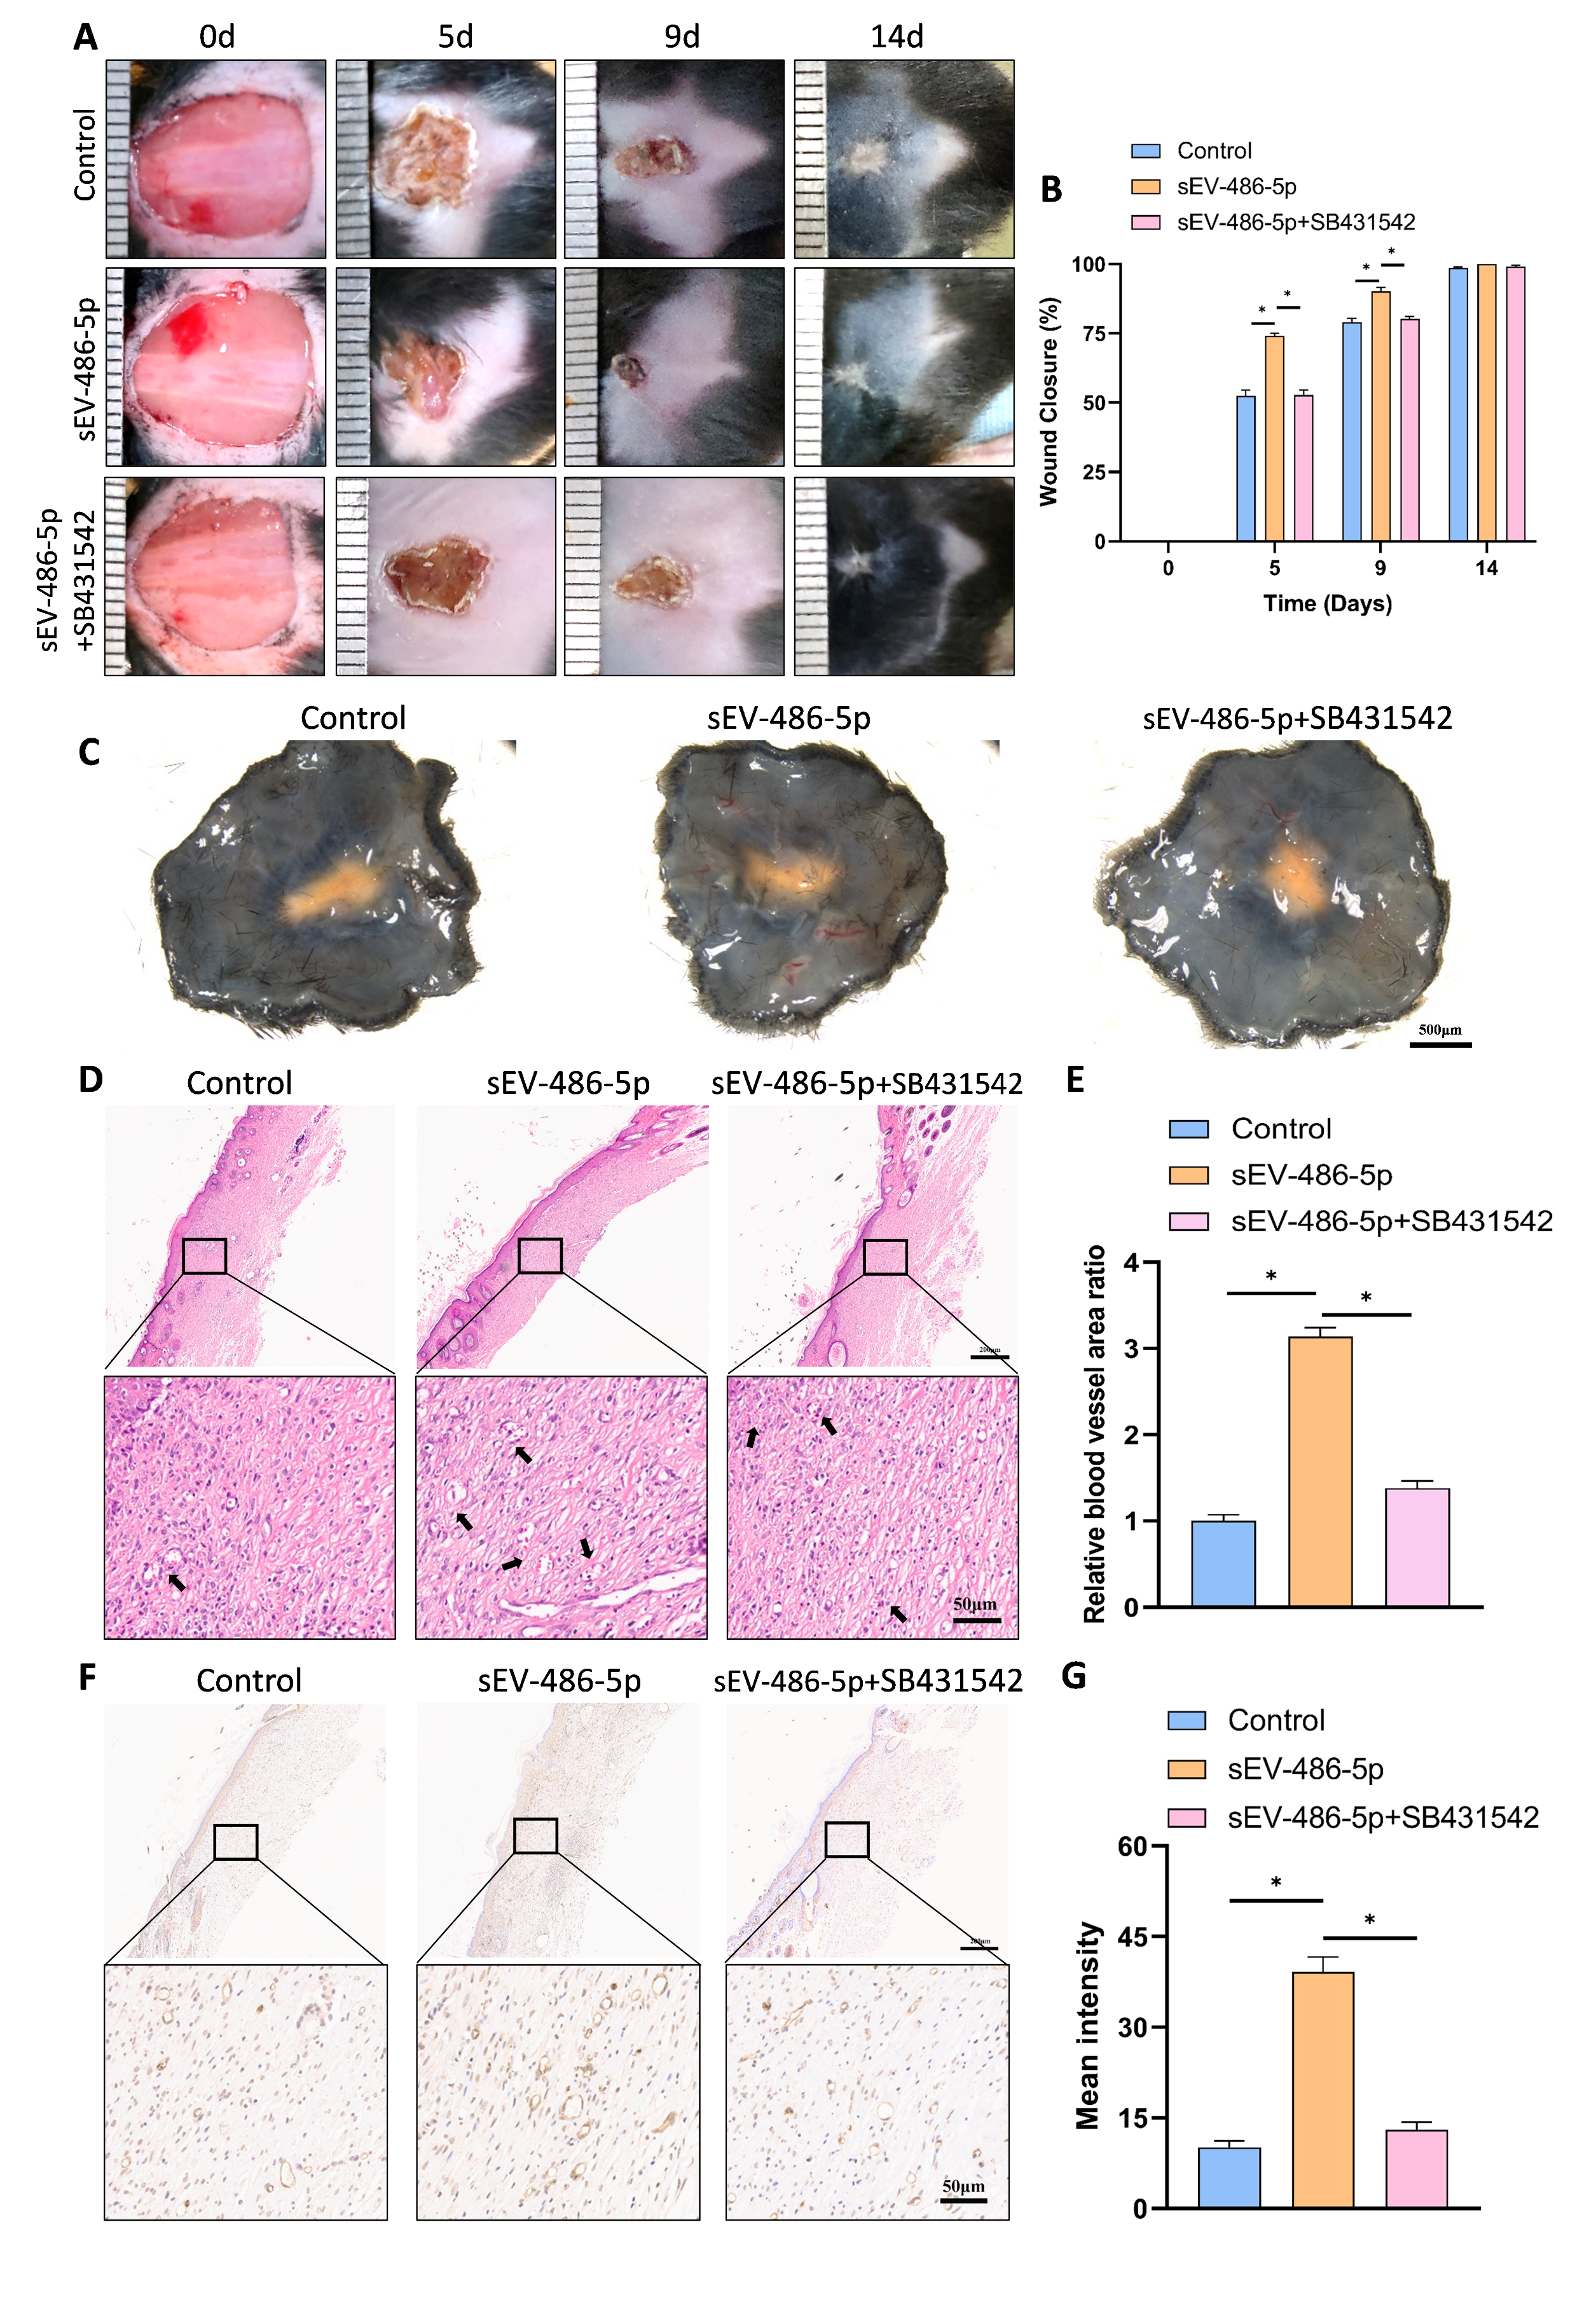


Figure S1.sEV-486-5p accelerated wound healing by promoting angiogenesis via the TGF-β1/Smad2 signaling pathway in mice. (A) Gross view of wounds treated with PBS + vehicle, sEV-486-5p + vehicle, or sEV-486-5p + SB431542 at day 0, 5, 9 and 14 days after surgery (Scale bar, 1 cm). (B) The wound healing rates of mice receiving different therapies (n = 3). (C) Gross view of skin samples that received different therapies was collected 14 days post-wounding (Scale bar, 500 μm). (D & E) H&E staining of wound sections and quantitative analysis of blood vessel formation in wounds receiving different therapies (n = 3; Scale bar, 200 μm). (F & G) Immunohistochemical staining of wound sections and quantitative analysis of CD31 expression (n = 3; Scale bar, 200 μm). **P* < 0.05. Control group, treated with PBS; sEV-486-5p, extracellular vesicles derived from miR-486-5p-overexpressing DPSCs; TGF-β1, transforming growth factor-β1; Smad2, Smad family member 2.

**Reference:**

1. Zhou Z, Zheng J, Lin D, et al. Exosomes derived from dental pulp stem cells accelerate cutaneous wound healing by enhancing angiogenesis via the Cdc42/p38 MAPK pathway. Int J Mol Med. 2022, 50:143.

**Table 1. Primer sequences used for real-time PCR**


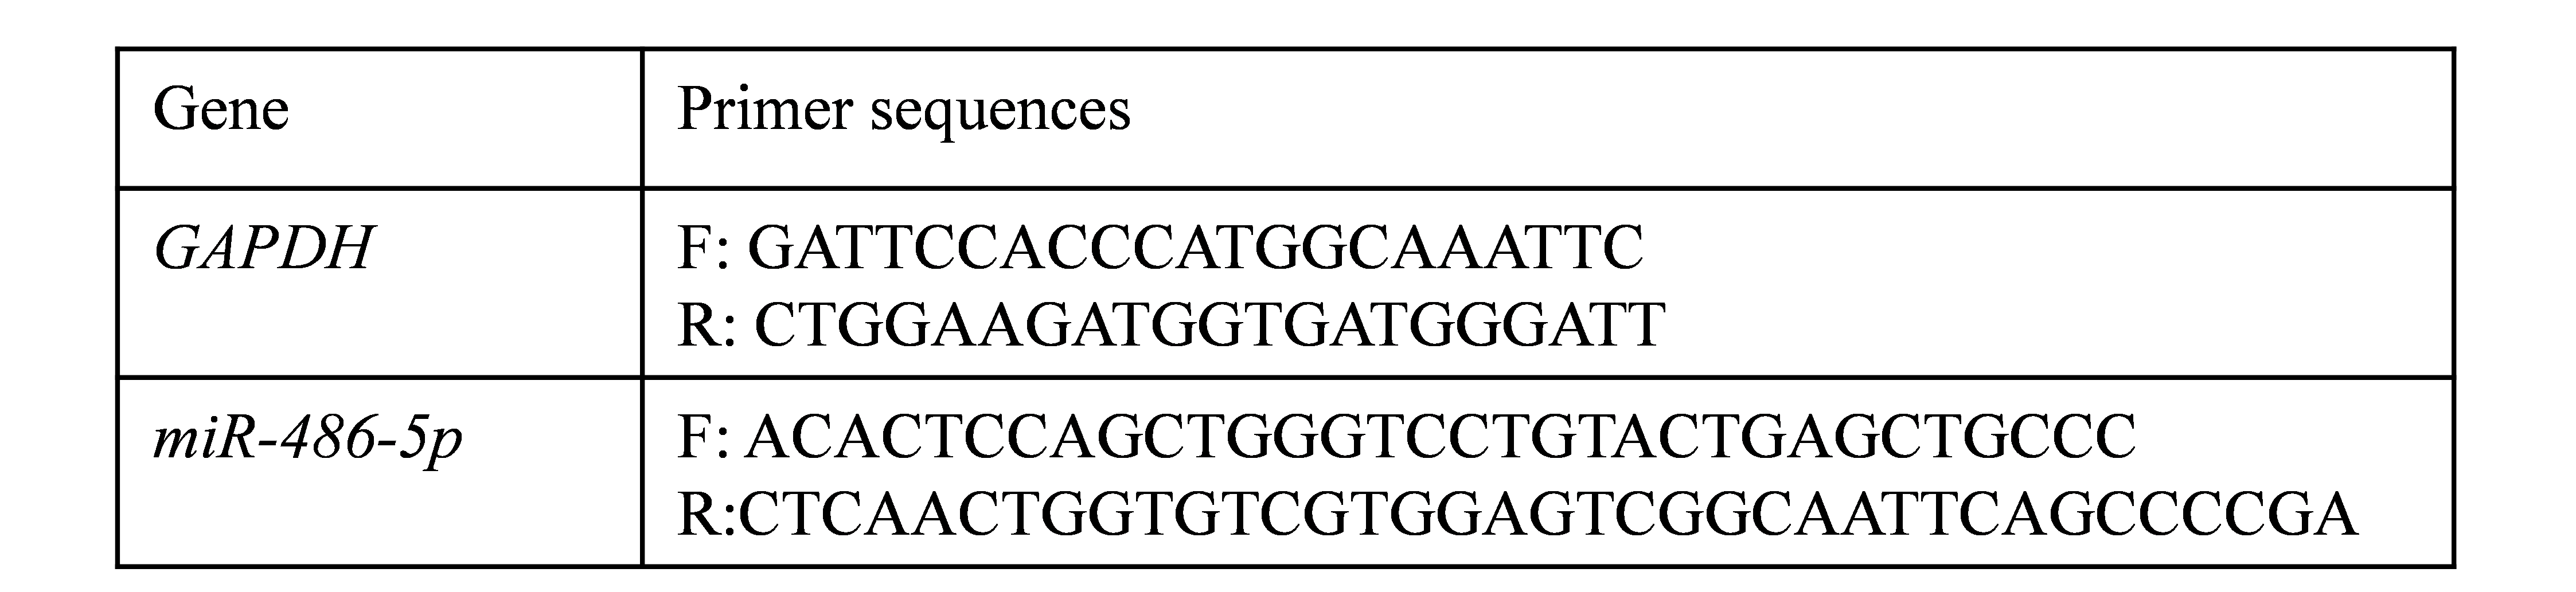

Supplement: Supplementary file 1 [file 2e798cbc88c40ce09fe19dac.docx]
